# Supplementary material for: Randomized Trial of Cold Plasma and Vitamin C Synergy: Effects on Skin Hydration and Wrinkle Reduction
Source: Research Square preprint supplement (doi:10.21203/rs.3.rs-5237210/v1), 2024-12-09
Supplement: Supplementary file 1 [file d402a41a1b71dc190cecefea.docx]

Protocol for Plasma Skin Rejuvenation Using FEDBD Device

**Study Design and Objective**

This protocol outlines the methodology for investigating the effects of cold atmospheric plasma (CAP) generated by the Floating Electrode Dielectric Barrier Discharge (FEDBD) device on skin rejuvenation. The primary objective is to evaluate the impact of different power levels (3.3 W and 7.4 W) of plasma on skin elasticity, hydration, oxygenation, and wrinkle reduction when combined with Vitamin C.

**Participants**

**Inclusion Criteria:**

- 1. Age: 25–45 years (24 participants)
  2. Non-smokers for at least six months
  3. No chronic skin conditions (e.g., eczema, psoriasis)
  4. No recent or current skin treatments on the target area
  5. Healthy individuals without underlying medical conditions that could affect skin physiology or sensitivity to treatment

**Exclusion Criteria:**

- Pregnancy or breastfeeding
- Allergies to Vitamin C or any component of the treatment regimen
- History of skin cancer or other severe dermatological conditions
- Use of medications affecting skin health (e.g., isotretinoin)

**Ethical Approval and Informed Consent**

The study was approved by the National Institute for Medical Research Development (NIMAD), Tehran University of Medical Sciences (Protocol No. IR.TUMS.MEDICINE.REC.1400.1135). Informed consent was obtained from all participants prior to treatment. The study was registered in the Iranian Registry of Clinical Trials with Trial ID: 65352 and IRCT ID: IRCT20160514027888N1.

**Equipment and Materials**

- **FEDBD Plasma Device** (Plasma Fanavari Jam Company)
  - Power levels: 3.3 W and 7.4 W
  - Frequency: 21 kHz
  - Glass probe for plasma generation
  - Probe distance from the target surface: 3–5 mm
- **Spectrometer** (AvaSpec-ULS 3648-USB2, AVANTES)
  - Wavelength range: 200–1100 nm
  - Resolution: 6–7 nm
- **Hyperspectral Imaging System** (TIVITA Tissue, Diaspective Vision, Germany)
  - Parameters measured: Tissue Oxygen Saturation (StO2), Tissue Hemoglobin Index (THI), Infrared Perfusion Index (IR), and Tissue Water Index (TWI)
- **Elastometer** (EM 25) for skin elasticity measurement
- **Contact Angle Measurement Device** (SDC100) for hydrophilicity evaluation
- **Thermal Camera** (FLIR) for temperature monitoring during plasma treatment
- **Vitamin C Treatment** (C Prime Serum) for group comparison

**Treatment Groups**
Participants will be randomly assigned to one of the following groups:

- **Group 1:** Plasma treatment at 3.3 W for 5 minutes 8 seconds
- **Group 2:** Plasma treatment at 7.4 W for 5 minutes 8 seconds
- **Group 3:** Vitamin C treatment only
- **Group 4:** Plasma treatment at 7.4 W for 5 minutes 8 seconds, followed by Vitamin C treatment (C Prime Serum)
- **Group 5:** Control that no treatment was done

**Procedure**

**Pre-Treatment Measurements**:

- - **Skin elasticity** will be measured using the EM 25 elastometer.
  - **Contact angle** and **hydrophilicity** will be assessed using the SDC100 device.
  - **Skin oxygenation and perfusion** will be evaluated using hyperspectral imaging.
  - **Skin temperature** will be recorded using the FLIR thermal camera.

**Treatment Application**:

- - The FEDBD plasma device will be applied to the target skin area at a distance of 3–5 mm from the surface.
  - Plasma treatment will be administered for 5 minutes and 8 seconds for groups and group 4 receiving Vitamin C application immediately following plasma treatment.

**Post-Treatment Measurements**:

- - Skin parameters will be measured immediately after treatment and at subsequent intervals: immediately after processing, 4 weeks, 8 weeks, and 6 weeks after the final session.
  - Hyperspectral imaging will be used to monitor changes in skin oxygenation, perfusion, hemoglobin, and hydration.

**Data Collection and Analysis**

- **Skin Hydration and Oxygenation:** Measured via hyperspectral imaging, with key indices including StO2, TWI, and THI.
- **Skin Elasticity:** Measured using the EM 25 elastometer, expressed as a percentage change from baseline.
- **Skin Hydrophilicity:** Measured using the SDC100 contact angle measurement device.
- **Temperature Monitoring:** Temperature variations during treatment will be documented via the FLIR thermal camera.

The data will be analyzed using SPSS statistical software. Comparisons between treatment groups will be performed using analysis of variance (ANOVA), with post-hoc tests to determine significant differences between groups.

**Follow-Up**

- Participants will be monitored for any adverse effects during the study period.
- A final biometric analysis will be conducted six weeks after the completion of the treatment sessions.

**Expected Outcomes**

- **Primary Outcome:** Significant improvement in skin elasticity, hydration, and oxygenation in plasma-treated groups, with the 7.4 W treatment combined with Vitamin C showing the most pronounced effects.
- **Secondary Outcome:** The effect of plasma treatment on skin lightening and wrinkle reduction, as well as the synergy between cold plasma and Vitamin C.

**Data Availability**

The datasets generated and analyzed during the current study are available from the corresponding author upon reasonable request.

**Funding and Acknowledgements**

This work was supported by the Skin and Stem Cell Research Center of Tehran University of Medical Sciences (Grant No. 1400-1-101-52207) and the Plasma Medicine Lab at Shahid Beheshti University.

**Author Contributions**
N.E, F.O, M.A.N, and M.R.K. designed the experiments. M.A.N, M.A.A, B.S, and M.R.K. conducted the experiments. N.E, F.O, M.L, and M.R.K. performed biological analyses. N.E, F.O, and M.A.N analyzed plasma treatment data and results. N.E, F.O, and M.R.K. wrote the manuscript. All authors contributed to the manuscript revision.
